# Supplementary material
Source: Springer Nature journal article supplement (https://www.springermedizin.de/resource/supplementary/12916_2012_574_MOESM1_ESM.pdf/9598184)
Supplement: MOESM1 [file 9598184]

Records identified through  
database search  
(n = 1504)

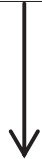

Abstracts screened  
(n = 268)

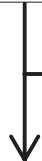

Full-text articles assessed for  
eligibility  
(n = 70)

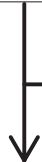

Studies included in current  
review  
(n = 26)

Records excluded (n = 198)  
-Tumor markers measured in other tissues  
(human amniotic fluid, fetal membranes,  
fetal tissue, endometrium, myometrium,  
decidua, trofoblast).

Full-text articles excluded (n = 44)  
-Serum tumor markers measured in case of  
obstetrical complications (e.g. miscarriage,  
ectopic pregnancy, pre-eclampsia,  
intrauterine growth restriction, high risk  
pregnancy, chromosomal abnormalities).  
-Gestational age not reported.

Identification

Screening

Eligibility

Included
